# Supplementary material for: Phyllotactic regularity requires the Paf1 complex in Arabidopsis
Source: Oxford University Press journal article supplement (doi:10.1242/dev.154369), 2017-01-01
Supplement: dev154369supp.pdf [file dev154369supp.pdf]

## Figure S1

A

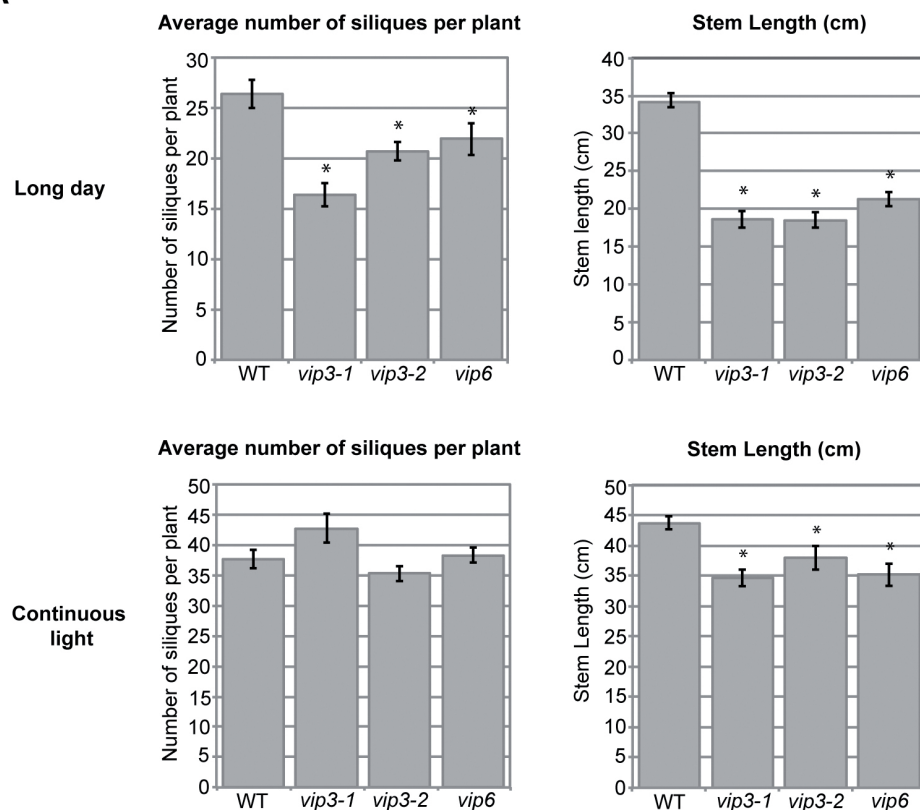

B

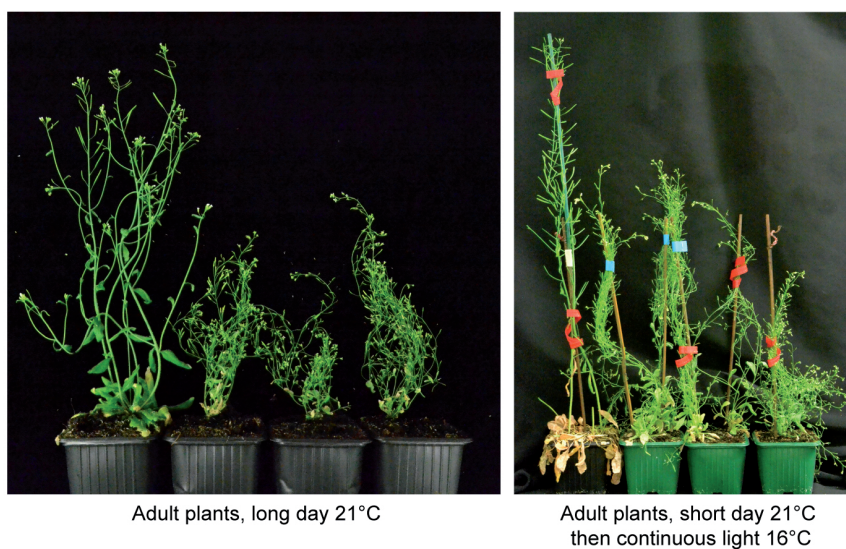Fig. S1. Effect of growth conditions on *vip* mutant phenotype.

(A) Inflorescence stem length (right) and number of siliques along the main inflorescence stems (left) from plants grown at long day 21°C (referred as "long day") and short day 21°C then continuous light 16°C (referred as "continuous light"). Sample size: number of siliques, long day: WT (n=20), *vip3-1* (n=15), *vip3-2* (n=15), and *vip6* (n=18); number of siliques, continuous light: WT (n=54), *vip3-1* (n=20), *vip3-2* (n=52), and *vip6* (n=30); stem length, long day: WT (n=19), *vip3-1* (n=15), *vip3-2* (n=22), *vip6* (n=14); stem length, continuous light: WT (n=22), *vip3-2* (n=18), *vip3-1* (n=18), *vip6* (n=12). The error bars represent the Standard error of mean, the results were considered significant when  $\alpha \leq 0.05\%$  by two-tailed Student tests.

(B) WT and *vip* mutant phenotypes of adult plants grown in long day (left) and continuous light (right) conditions.

## Figure S2

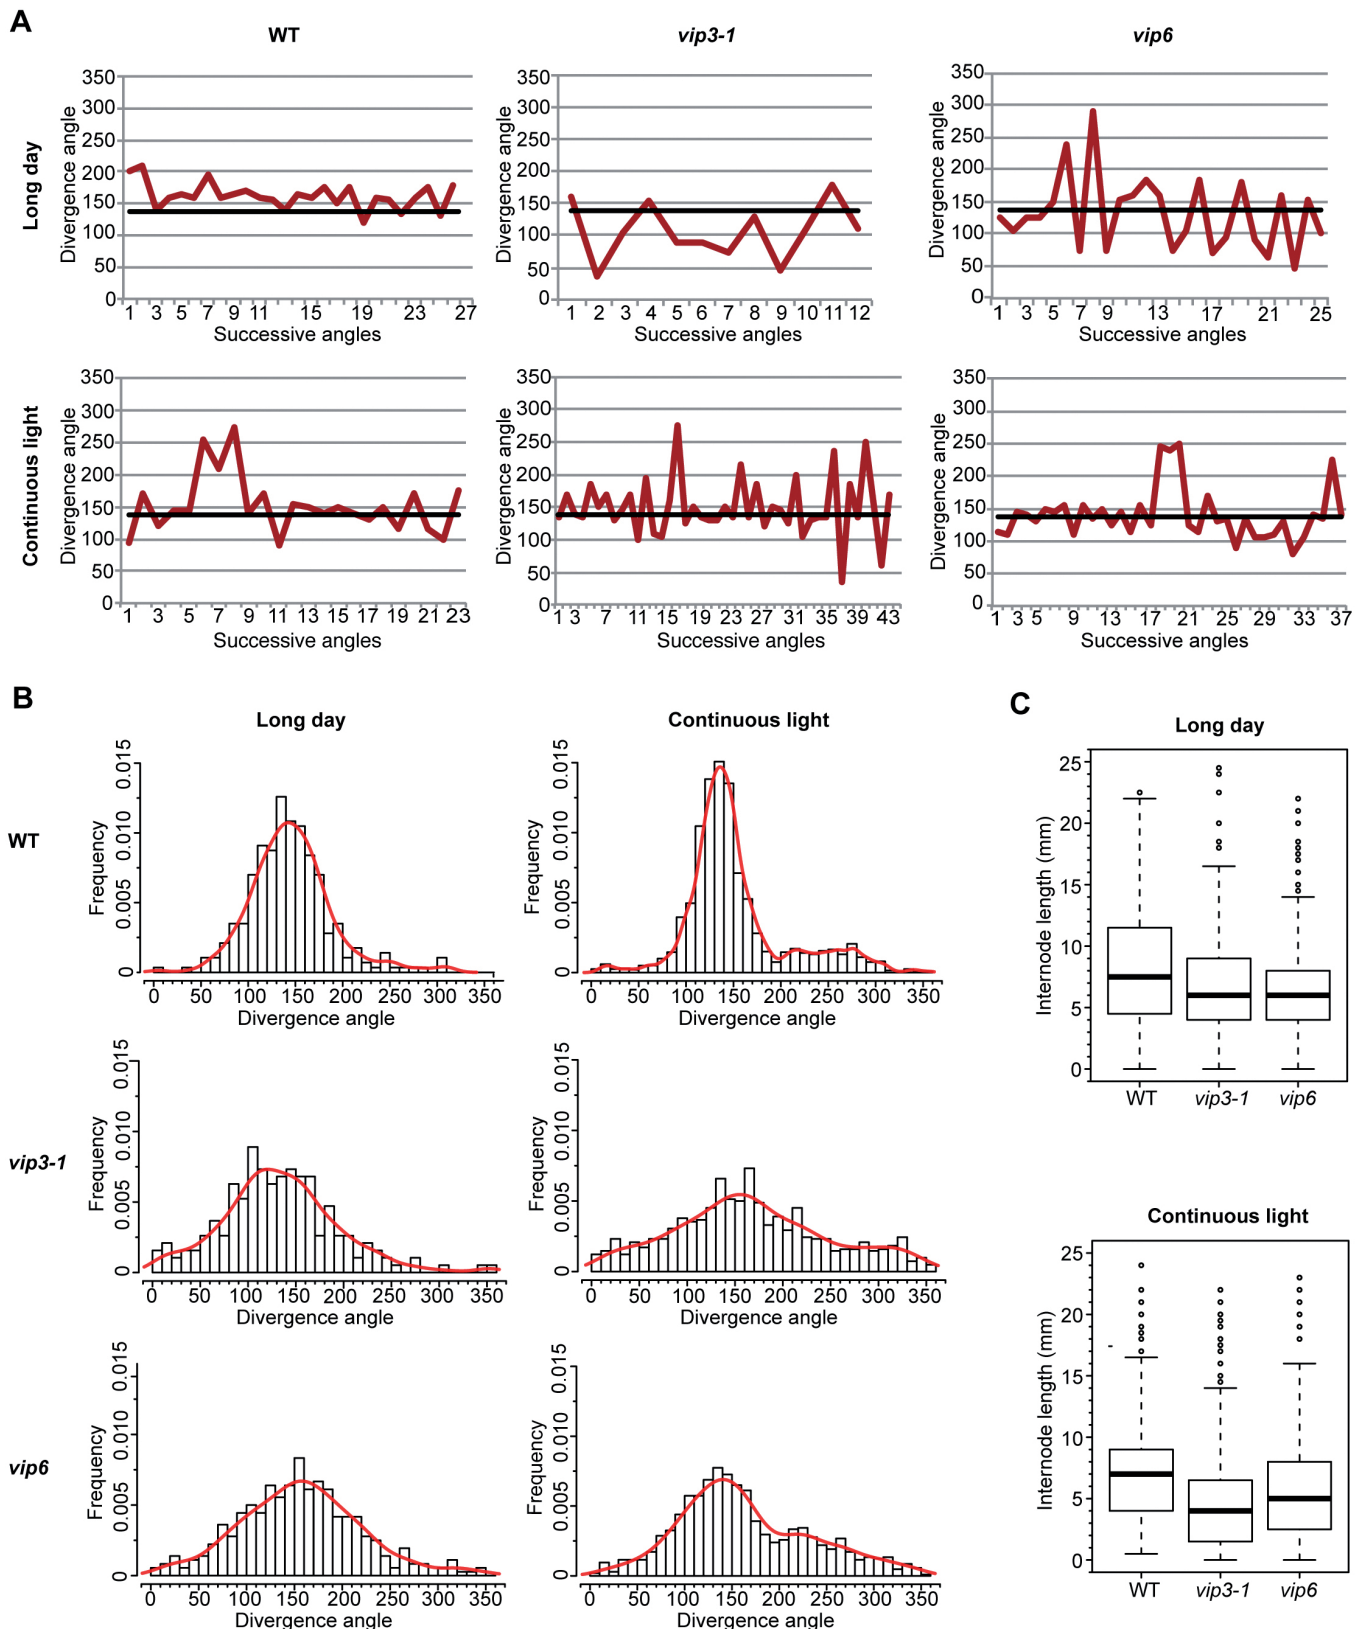

**Fig. S2. Phyllotaxis is affected in *vip3* and *vip6* mutant plants.**

(A) Sequence of divergence angles in representative WT, *vip3-1* and *vip6* plants grown in long day (upper panel) or continuous light (lower panel) conditions. The thick black line on each graph represents the canonical angle of  $137^\circ$ . (B) Frequency of divergence angles between successive siliques in WT, *vip3-1* and *vip6* plants grown in long day (left panel, WT: 305 angles, 20 plants; *vip3-1*: 201 angle, 15 plants; *vip6*: 366 angles, 18 plants) and continuous light (right panel, WT: 1997 angles, 54 plants, *vip3-1*: 820 angles, 20 plants, *vip6*: 1046 angles, 30 plants) conditions. (C) Average internode length on the inflorescence stem in WT, *vip3-1* and *vip6* plants grown at long day (left panel, WT: 520 internodes, 20 plants; *vip3-1*: 246 internodes, 15 plants; *vip6*: 420 internodes, 18 plants) and continuous light (right panel, WT: 620 internodes, 21 plants; *vip3-1*: 939 internodes, 20 plants; *vip6*: 1082 internodes, 30 plants) conditions. The black line in the boxplot represents the median, the box represents the distribution range of 50% of the measured values and the bars (whiskers) illustrate the upper and lower quartiles. The average internode length on *vip3* mutant plants is not significantly different from that of the wild type, but the frequency of shorter internodes is increased when compared to wild-type stems

## Figure S3

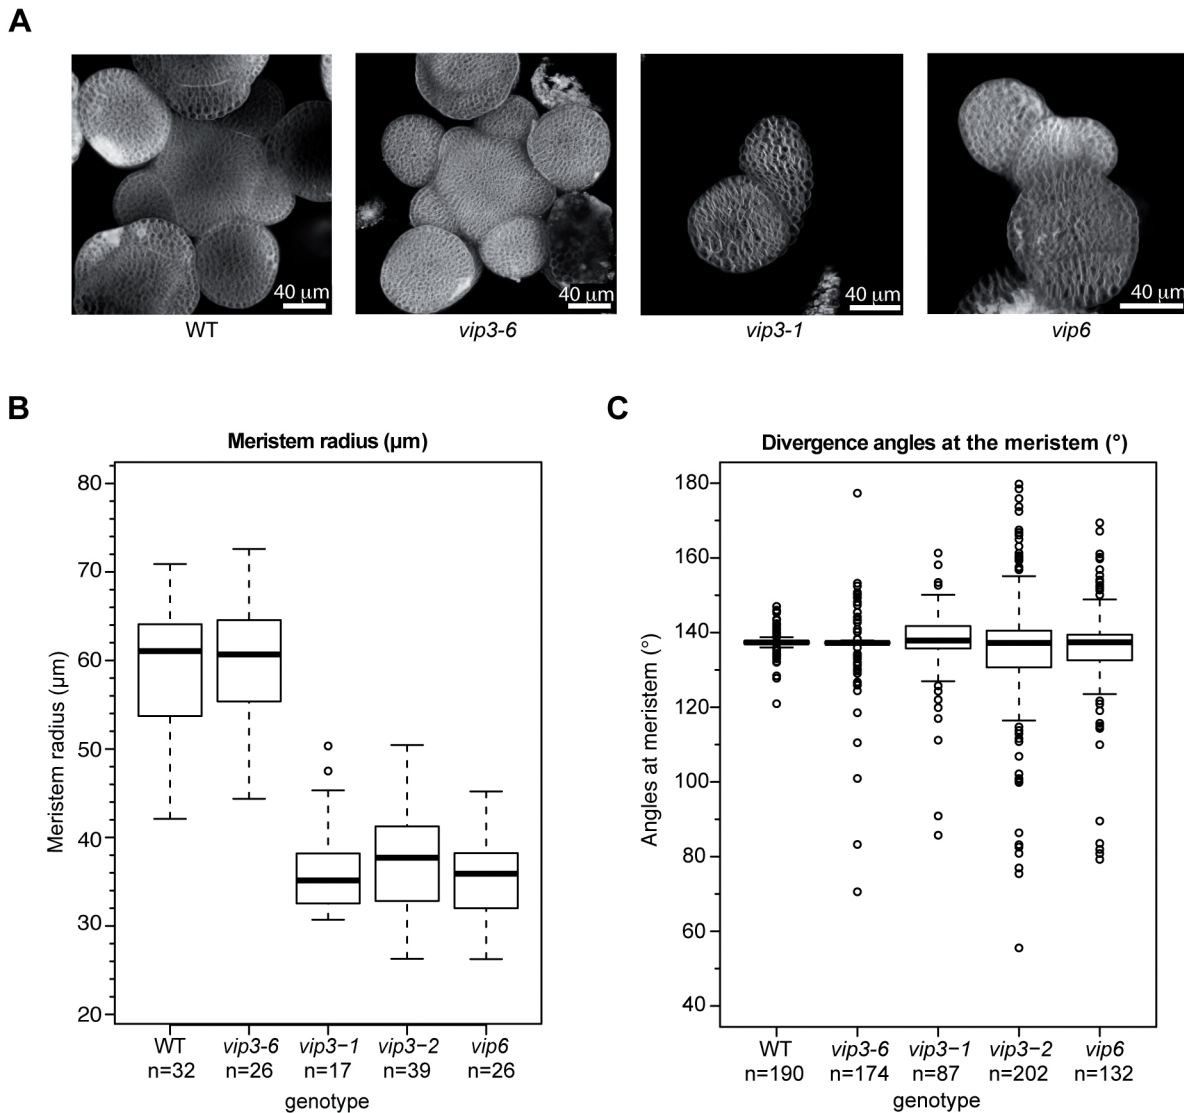

**Fig. S3. Meristem size and divergence angles in WT, *vip3-1*, *vip3-6* and *vip6*.**

(A) Representative WT, *vip3-6*, *vip3-1*, *vip6* meristems (surface projections), labelled with FM4-64. (B) Meristem radius ( $\mu\text{m}$ ) in WT ( $n=32$ ), *vip3-6* ( $n=26$ ), *vip3-1* ( $n=17$ ), *vip3-2* ( $n=39$ ) and *vip6* ( $n=26$ ) grown in continuous light conditions. Data for the WT and *vip3-2* are reproduced from Figure 4 to ease the comparison between genotypes. Meristem radius was measured as described in (Landrein et al., 2015b);  $\alpha \leq 0.05\%$  by two-tailed Student tests. (C) Divergence angle between primordia at the SAM in WT ( $n=190$ ), *vip3-6* ( $n=172$ ), *vip3-1* ( $n=87$ ), *vip3-2* ( $n=202$ ) and *vip6* ( $n=132$ ). The angles between the successive organs were estimated as described in (Landrein et al., 2015b).



## Figure S4

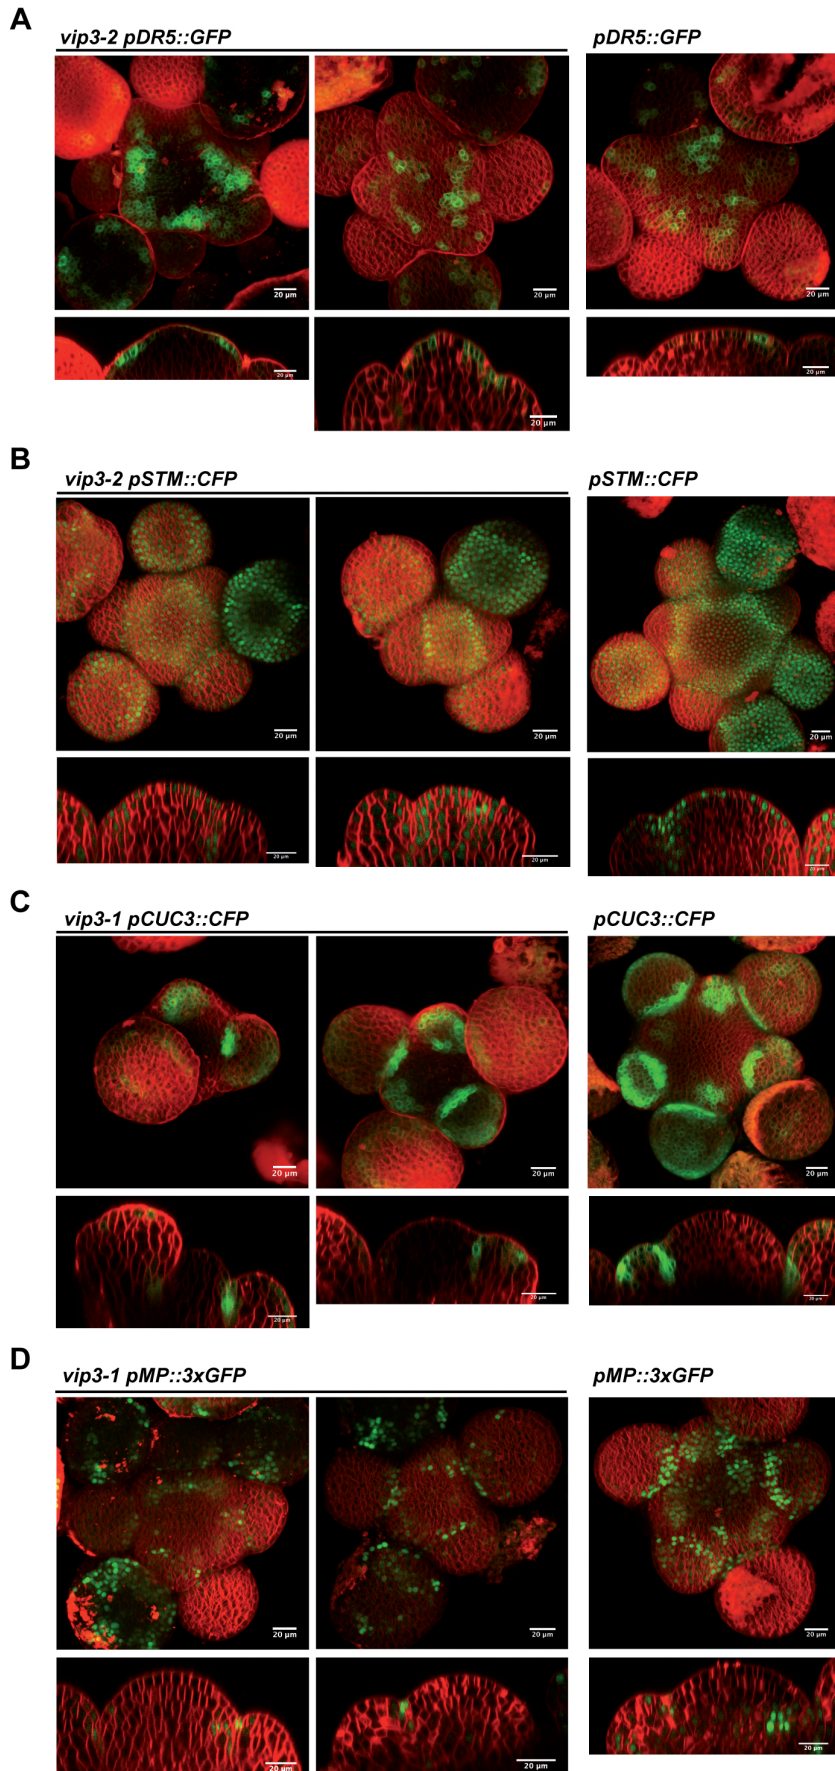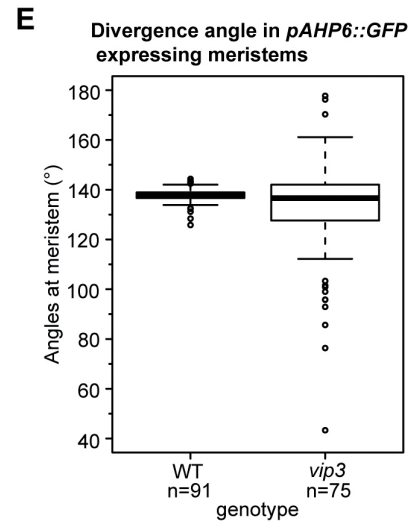

**Fig. S4.** *pDR5::GFP*, *pSTM::CFP-N7*, *pCUC3::CFP* and *pMP::3xGFP* expression patterns in *vip3*

(A) Two examples of *vip3-2* mutant meristems expressing *pDR5::GFP* (green), labelled with FM4-64 (red). Note the absence of focused DR5 peaks, when compared to the WT (Fig. 5A). Scale bars=20  $\mu$ m. Lower panels: orthogonal optical sections of the same meristems.

(B) Two examples of *vip3-2* mutant meristems expressing *pSTM::CFP-N7* (green), labelled with FM4-64 (red). Note the stronger expression in boundaries in both WT and mutant. Scale bars=20  $\mu$ m. Lower panels: orthogonal optical sections of the same meristems.

(C) Two examples of *vip3-1* mutant meristems expressing *pCUC3::CFP* (green), labelled with FM4-64 (red). Note the stronger expression in boundaries in both WT and mutant. Scale bars=20  $\mu$ m. Lower panels: orthogonal optical sections of the same meristems.

(D) Two examples of *vip3-1* mutant meristems expressing *pMP::3xGFP* (green), labelled with FM4-64 (red). Note the weaker signal intensity when compared to the WT. Scale bars=20  $\mu$ m. Lower panels: orthogonal optical sections of the same meristems.

(E) Divergence angles between successive primordia in WT (n=91) and *vip3-2* (n=75) mutant meristems with *pAHP6::GFP*. The angles were measured as described in (Landrein et al., 2015b). The boxplots represent the median and the quartile range distribution of the measured values.



**Table S1.** List of primers

| <b>Name</b>             | <b>Sequence</b>                                    |
|-------------------------|----------------------------------------------------|
| <i>VIP3_in_situ_F</i>   | GAGAATGAAACTCGCAGGTC                               |
| <i>VIP3_in_situ_RT7</i> | TAATACGACT CACTATAGGGCTTGTCATCA GAGACACTAGC        |
| <i>STM_in_situ_F</i>    | GAGATGTGATCCATTGGGAAAGG                            |
| <i>STM_in_situ_RT7</i>  | TGTAATACGACTCACTATAGGGCGGTCCGATGTGTCCTATGATGATGATG |
| <i>CLV3_in_situ_F</i>   | ATGTCCGGTCCAGTTCAACAAC                             |
| <i>CLV3_in_situ_RT7</i> | TGTAATACGACTCACTATAGGGCGGTCCAGGTCCCGAAGGAACA       |
| <i>MP_in_situ_F</i>     | ATGATGGCTTCATTGTCTTGTG                             |
| <i>MP_in_situ_RT7</i>   | TGTAATACGACTCACTATAGGGCTTATGAAACAGAAGTCTTAA        |
| <i>GFP_in_situ_F</i>    | AAGAACTTTTCACTGGAGTTGTCCC                          |
| <i>GFP_in_situ_RT7</i>  | TGTAATACGACTCACTATAGGGCCGCTTCCATCTTCAATGTTGTGTCT   |
|                         |                                                    |
| LBb1.3                  | ATTTTGCCGATTTTCGGAAC                               |
| <i>vip6 F</i>           | GATGCAACTGATGGGAAGGACTC                            |
| <i>vip6 R</i>           | CACCCATACATCAGGCATCTGAAG                           |
| <i>vip3-1 F</i>         | GACTGCAAGTACCACTTTCGC                              |
| <i>vip3-1 R</i>         | TAATGGGAAACGACTTGCTTG                              |
| <i>vip3-2 F</i>         | CTGACTGGATCTCTTGACGAGACG                           |
| <i>vip3-2 R</i>         | GATACTCAGCAATTCCATATAGTACCCAAGC                    |
| <i>vip3-6 F</i>         | GCAATTAGCTGACGACGGCGGG                             |
| <i>vip3-6 R</i>         | GATCCAGCTCGTCCGGTCGCC                              |
